# Supplementary material for: The effect of medial open wedge high tibial osteotomy on the patellofemoral joint: comparative analysis according to the preexisting cartilage status
Source: PubMed Central journal article supplement (PMC6911704; doi:10.1186/s12891-019-2989-y), 2019-12-14
Supplement: 12891_2019_2989_MOESM1_ESM.pdf [file 12891_2019_2989_MOESM1_ESM.pdf]

**Additional file 1** Subgroup analysis of preoperative variables within group 1

| Variable                                                                                             | ICRS grade 2<br>(n=12) | ICRS grade 3<br>(n=47) | P value |
|------------------------------------------------------------------------------------------------------|------------------------|------------------------|---------|
| Age <sup>a</sup> (year)                                                                              | 54.8 ± 4.0             | 54.1 ± 5.5             | 0.770   |
| Gender <sup>b</sup>                                                                                  |                        |                        | 0.482   |
| Male                                                                                                 | 2 (16.7%)              | 14 (29.8%)             |         |
| Female                                                                                               | 10 (83.3%)             | 33 (70.2%)             |         |
| BMI <sup>a</sup> (kg/m <sup>2</sup> )                                                                | 23.5 ± 7.6             | 26.9 ± 5.2             | 0.055   |
| Load-bearing axis deviation <sup>a</sup> (%)                                                         | 18.0 ± 9.0             | 19.3 ± 12.4            | 0.713   |
| Preoperative Hip-Knee-Ankle angle <sup>a</sup> (varus, °)                                            | 7.7 ± 2.6              | 7.9 ± 3.0              | 0.955   |
| Medial proximal tibial angle <sup>a</sup> (°)                                                        | 83.6 ± 2.4             | 84.1 ± 2.2             | 0.799   |
| Joint line convergence angle <sup>a</sup> (°)                                                        | 2.4 ± 1.2              | 3.4 ± 1.8              | 0.078   |
| Posterior tibial slope (°)                                                                           | 6.5 ± 4.0              | 5.5 ± 3.0              | 0.457   |
| Preoperative Blackburne-Peel ratio <sup>a</sup>                                                      | 0.9 ± 0.2              | 0.9 ± 0.2              | 0.118   |
| Preoperative Caton-Deschamps ratio <sup>a</sup>                                                      | 1.1 ± 0.2              | 1.0 ± 0.2              | 0.292   |
| Preoperative Lateral patellofemoral angle <sup>a</sup> (°)                                           | 12.1 ± 3.9             | 14.4 ± 4.6             | 0.072   |
| Trochlear dysplasia grade<br>according to the Dejour classification <sup>b</sup>                     |                        |                        | 0.499   |
| No                                                                                                   | 12 (100.0%)            | 44 (93.6%)             |         |
| Type A                                                                                               | 0 (0.0%)               | 3 (6.4%)               |         |
| Preoperative Kellgren–Lawrence grade <sup>b</sup>                                                    |                        |                        | 0.136   |
| Grade 2                                                                                              | 5 (41.7%)              | 7 (14.9%)              |         |
| Grade 3                                                                                              | 6 (50.0%)              | 31 (66.0%)             |         |
| Grade 4                                                                                              | 1 (8.3%)               | 9 (19.1%)              |         |
| Preoperative patellofemoral osteoarthritis<br>stage according to Iwano’s classification <sup>b</sup> |                        |                        | 0.426   |
| Stage 0                                                                                              | 3 (25.0%)              | 7 (14.9%)              |         |
| Stage 1                                                                                              | 6 (50.0%)              | 21 (44.7%)             |         |
| Stage 2                                                                                              | 3 (25.0%)              | 19 (40.4%)             |         |
| Correction angle <sup>a</sup> (°)                                                                    | 11.1 ± 2.3             | 11.0 ± 2.1             | 0.895   |
| Time to hardware removal (months) <sup>a</sup>                                                       | 20.3 ± 6.6             | 22.1 ± 6.2             | 0.406   |
| Composition of cartilage lesion on                                                                   |                        |                        | 0.185   |

|                                          |             |             |       |
|------------------------------------------|-------------|-------------|-------|
| patellofemoral joint                     |             |             |       |
| Unipolar lesion                          | 7 (58.3%)   | 16 (34.0%)  |       |
| Bipolar lesion                           | 5 (41.7%)   | 31 (66.0%)  |       |
| Preoperative clinical score <sup>a</sup> |             |             |       |
| VAS score                                | 72.3 ± 15.3 | 67.3 ± 18.3 | 0.463 |
| IKDC subjective score                    | 32.7 ± 12.6 | 34.1 ± 11.7 | 0.985 |
| Kujala score                             | 40.4 ± 14.0 | 37.8 ± 15.0 | 0.477 |

---

*BMI* body mass index, *VAS* Visual analogue scale, *IKDC* International Knee Documentation Committee

<sup>a</sup>The values are given as the mean and standard deviation, and compared between the groups by use of the Mann-Whitney U test

<sup>b</sup>The values are given as the number of patients with the percentage in parenthesis, and compared between the groups by use of the Pearson's Chi-squared or Fisher's exact
